# Supplementary material for: Synthesis of graphene/α-Fe2O3 composites with excellent electromagnetic wave absorption properties
Source: Royal Society of Chemistry journal article supplement (doi:10.1039/c5ra09715k), 2015-01-01
Supplement: c5ra09715k1.pdf [file c5ra09715k1.pdf]

## Supporting information

### **Synthesis of graphene/ $\alpha$ -Fe<sub>2</sub>O<sub>3</sub> composites with excellent electromagnetic wave absorption properties**

Tihong Wang,<sup>a</sup> Yongfeng Li,<sup>a\*</sup> Lina Wang,<sup>a</sup> Chao Liu,<sup>a</sup> Sai Geng,<sup>a</sup> Xilai Jia,<sup>a</sup> Fan Yang,<sup>a</sup> Liqiang Zhang,<sup>a</sup> Liping Liu,<sup>a</sup> Bo You,<sup>a</sup> Xiao Ren,<sup>b</sup> and Haitao Yang<sup>b\*</sup>

<sup>a</sup>*State Key Laboratory of Heavy Oil Processing, China University of Petroleum, Beijing, Changping 102249, P. R. China. Phone/Fax: +86-010-89739028. E-mail: yfli@cup.edu.cn*

<sup>b</sup>*Beijing National Laboratory for Condensed Matter Physics, Institute of Physics, Chinese Academy of Sciences, Beijing 100190, P. R. China. E-mail: htyang@aphy.iphy.ac.cn*

Figure S1

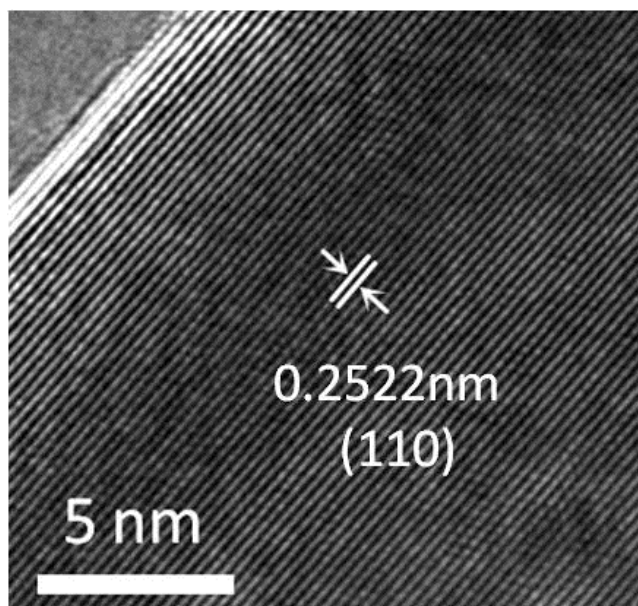

Fig. S1. A HRTEM image of Fe<sub>2</sub>O<sub>3</sub> nanoparticle in the composite

Figure S2

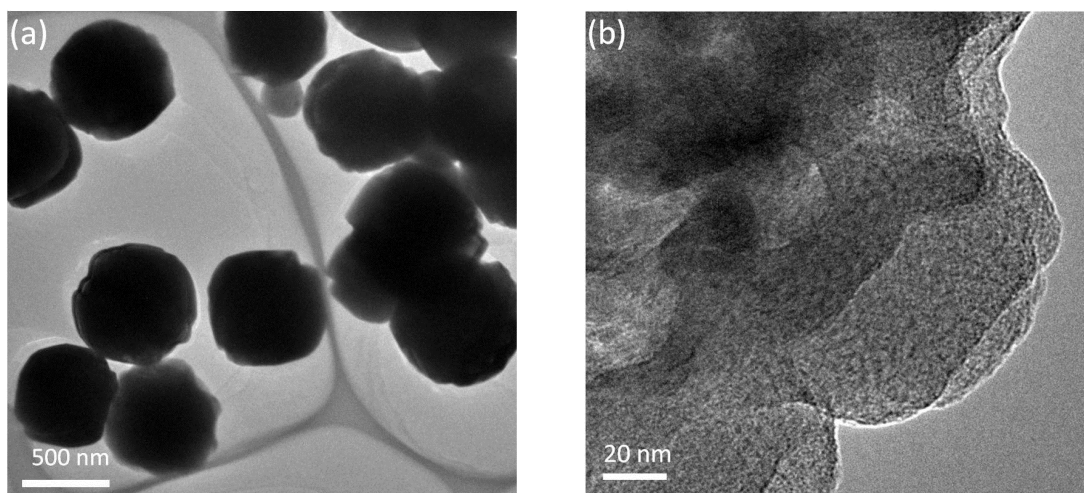

Figure S2 TEM images of Fe<sub>2</sub>O<sub>3</sub> formed with absence of GO. (a) A low resolution image. (b) A high resolution image.

Figure S3

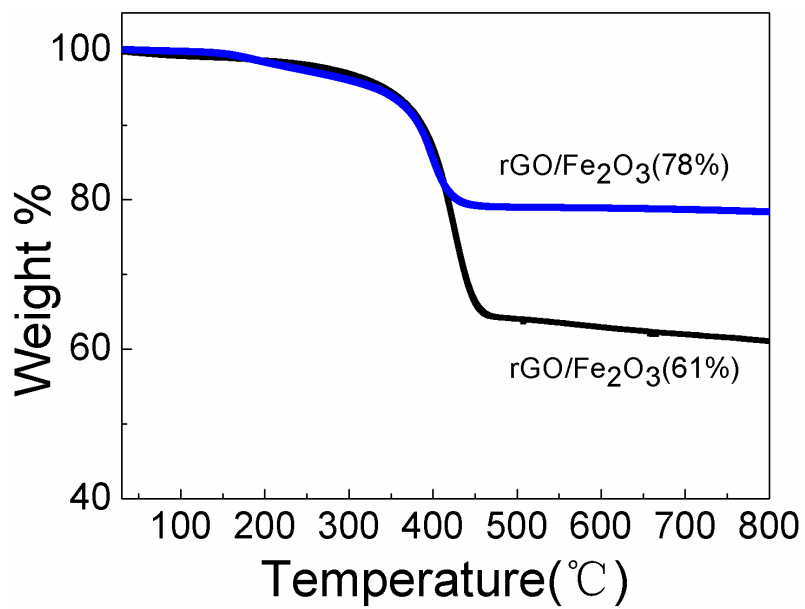

Fig. S3. TG curves of rGO/Fe<sub>2</sub>O<sub>3</sub> composites with different amounts of Fe<sub>2</sub>O<sub>3</sub> nanoparticles

Figure S4

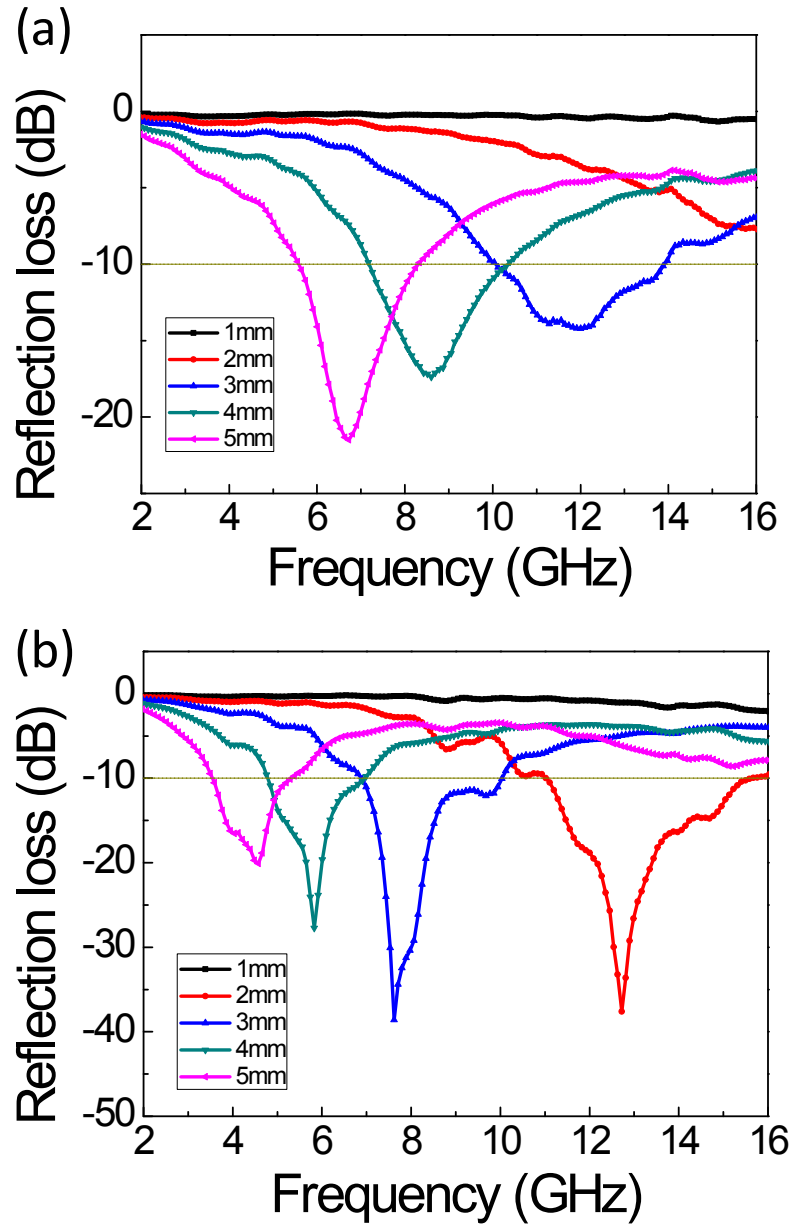

Fig. S4. The reflection loss of rGO/Fe<sub>2</sub>O<sub>3</sub> composites with different amounts of Fe<sub>2</sub>O<sub>3</sub> nanoparticles (a) 78%, (b) 61% measured with different thickness from 1 to 5mm.

Figure S5

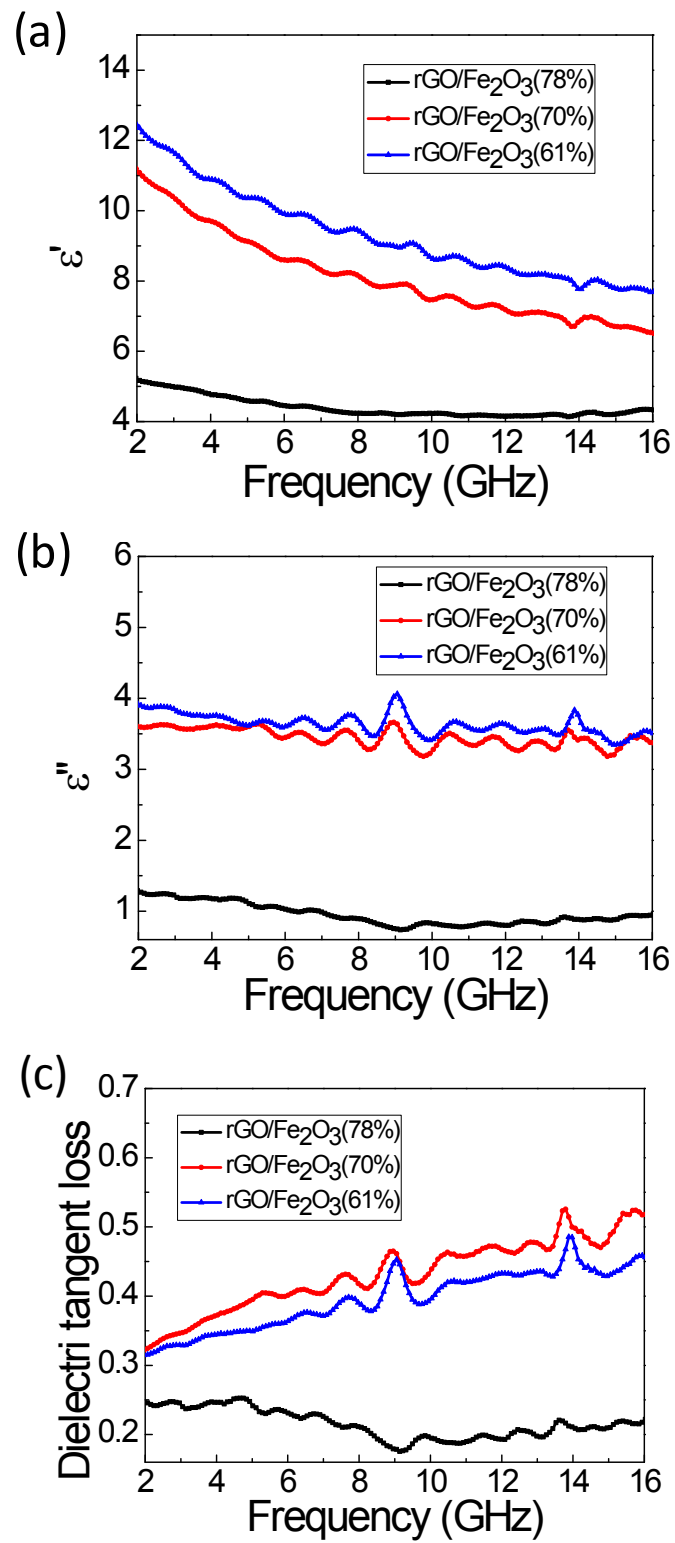

Fig. S5. Frequency dependence of real part (a) imaginary part (b) and dielectric loss tangent (c) for three kinds of rGO/Fe<sub>2</sub>O<sub>3</sub> composites.
